# Supplementary material
Source: publisher figshare collection journal article supplement (https://karger.figshare.com/articles/dataset/_/24657345)
Supplement: Supplementary file 1 [file 1]

**Supplementary Figure 1.** Flow diagram of the study.

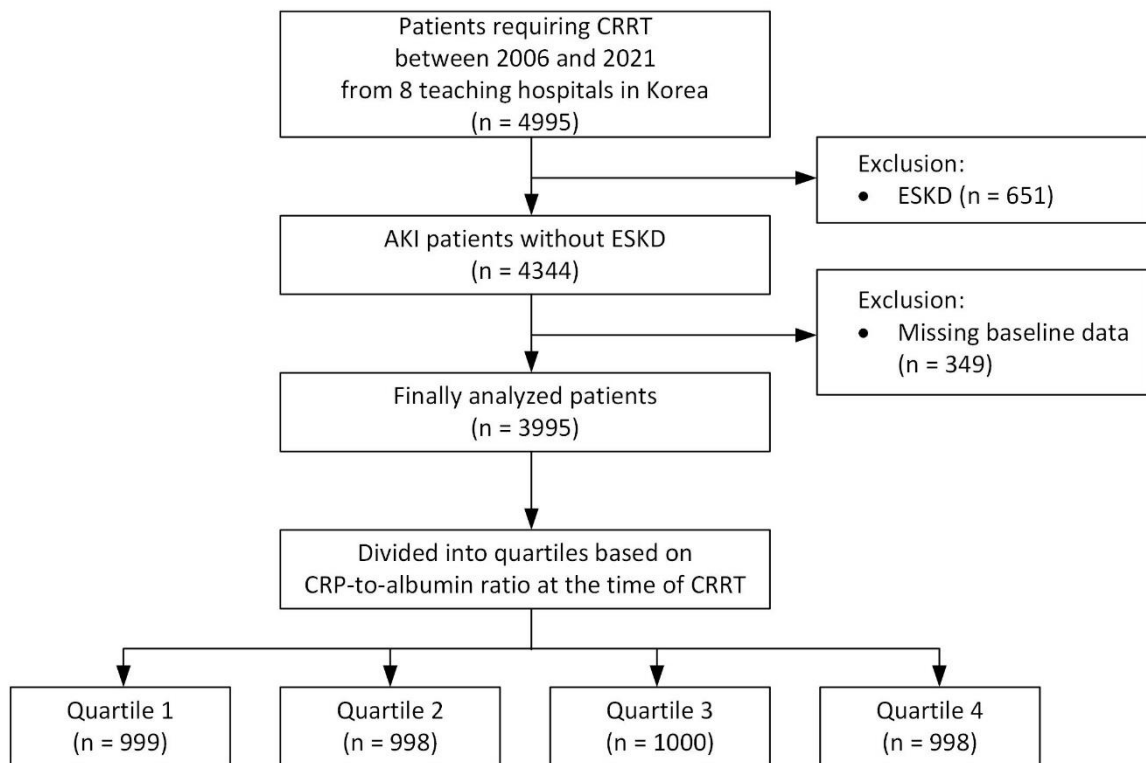

Abbreviations: CRRT, continuous renal replacement therapy; ESKD, end-stage kidney disease; AKI, acute kidney injury; CRP, C-reactive protein
